# Supplementary material
Source: PubMed Central journal article supplement (PMC4210044)
Supplement: pnas.201412716SI.pdf [file pnas.201412716SI.pdf]

# Supporting Information

Soyano et al. 10.1073/pnas.1412716111

## SI Materials and Methods

**Plasmid Construction.** Promoter regions of *CLE ROOT SIGNAL1* (*CLE-RS1*) and *CLE-RS2* were amplified by PCR from MG-20 genomic DNA. The promoter regions were cloned into pENTR-1A (Invitrogen) and then transferred into pMDC162-GFP (1) by LR clonase (Invitrogen). *Pro35S-NODULE INCEPTION* (NIN)-glucocorticoid receptor (GR), *ProNIN-GUS*, and *ProLjUb* (*Lotus japonicus polyubiquitin*)-*NIN-myc* have been described previously (1). For double transformation of roots with promoter-GUS constructs and either *Pro35S-NIN-GR* or its empty vector, *Pro35S-DsRed* was used as the transformation marker for the latter two constructs. Other vectors carried *Pro35S-GFP* as the marker. To analyze NIN-binding nucleotide sequences (NBSs) in *CLE-RS1* and *CLE-RS2* promoters, promoter fragments containing NBSs were amplified by PCR, and cloned upstream of the *CaMV35S* minimal promoter in pENTR-1A-35Smin (1). The resultant chimeric promoters were transferred into pMDC162 (2), pMDC162-GFP (1), and pMDC162-NIN, a pMDC162 derivative, into which *NIN* cDNA was inserted between XhoI sites to replace *HPH* (hygromycin phosphotransferase). Luciferase (LUC) cDNA that was cloned into pENTR-D/TOPO (Invitrogen) was transferred into pUB-GW-GFP (3). Nucleotide sequences of primers used for plasmid construction are listed in Table S1.

**Transient Expression Assay in *N. benthamiana* Leaves.** *A. tumefaciens* AGL1 transformed with vectors harboring each promoter-GUS reporter and another strain carrying *ProLjUb-LUC* were infiltrated as described by Llave et al. (4). Leaf tissue was harvested at 2.5 d after infiltration. GUS activity was measured as described by Jefferson et al. (5). Tissues (0.2 g) were frozen in liquid nitrogen and homogenized with a tissue lyzer (Quiagen).

Protein was extracted with 0.5 mL of extraction buffer (100 mM NaPO<sub>4</sub> pH 7.0, 10 mM EDTA, 10 mM β-mercaptoethanol, 0.1% Triton X-100, 0.1% *N*-lauryl-sarcosine, and 0.2 mM PMSF). After centrifugation, 20 μL of the clear supernatant was added into 0.3 mL of extraction buffer containing 20% methanol and 1.4 mM 4-methylumbelliferyl β-D-glucuronide, followed by incubation at 37 °C. Then 50 μL of the reaction mixture was transferred into 0.95 mL of 0.2 M Na<sub>2</sub>CO<sub>3</sub> at 0 and 30 min after incubation to stop the reaction. Samples were measured in a microplate reader (SH-9000Lab; Corona) at a 355-nm excitation wavelength and a 460-nm emission wavelength.

For measurement of luciferase activity, 5 μL of the extract was added into 100 μL of LUC assay buffer (20 mM Tricine pH 7.8, 5 mM MgSO<sub>4</sub>, 0.1 mM EDTA, 5 mM DTT, 150 μM CoA, 250 μM luciferin, and 250 μM ATP). Luminescence was measured in the microplate reader. GUS activities were normalized to those of luciferase.

**ChIP-seq Analysis.** Chromatin suspensions were prepared from roots transformed with an empty vector and *ProLjUb-NIN-myc*. ChIP was performed with polyclonal anti-myc antibodies (Santa Cruz Biotechnology). Libraries were prepared from three independent ChIP samples according to the instructions for the Illumina ChIP-seq DNA Sample Prep Kit and then sequenced with Hi-seq1000 (Illumina). After sequence reads were trimmed using the FASTX-Toolkit ([http://hannonlab.cshl.edu/fastx\\_toolkit/](http://hannonlab.cshl.edu/fastx_toolkit/)), 30,922,581 and 52,821,816 reads from empty vector control and NIN-myc, respectively, were mapped to *L. japonicus* genomic sequences using Bowtie 2 (6). MACS2 software (7) with default parameters was used to identify peaks representing enriched binding sites.

1. Soyano T, Kouchi H, Hirota A, Hayashi M (2013) Nodule inception directly targets *NF-Y* subunit genes to regulate essential processes of root nodule development in *Lotus japonicus*. *PLoS Genet* 9(3):e1003352.
2. Curtis MD, Grossniklaus U (2003) A gateway cloning vector set for high-throughput functional analysis of genes in plants. *Plant Physiol* 133(2):462–469.
3. Maekawa T, et al. (2008) Polyubiquitin promoter-based binary vectors for overexpression and gene silencing in *Lotus japonicus*. *Mol Plant Microbe Interact* 21(4):375–382.
4. Llave C, Kasschau KD, Carrington JC (2000) Virus-encoded suppressor of post-transcriptional gene silencing targets a maintenance step in the silencing pathway. *Proc Natl Acad Sci USA* 97(24):13401–13406.
5. Jefferson RA, Kavanagh TA, Bevan MW (1987) GUS fusions: Beta-glucuronidase as a sensitive and versatile gene fusion marker in higher plants. *EMBO J* 6(13):3901–3907.
6. Langmead B, Salzberg SL (2012) Fast gapped-read alignment with Bowtie 2. *Nat Methods* 9(4):357–359.
7. Zhang Y, et al. (2008) Model-based analysis of ChIP-Seq (MACS). *Genome Biol* 9(9):R137.



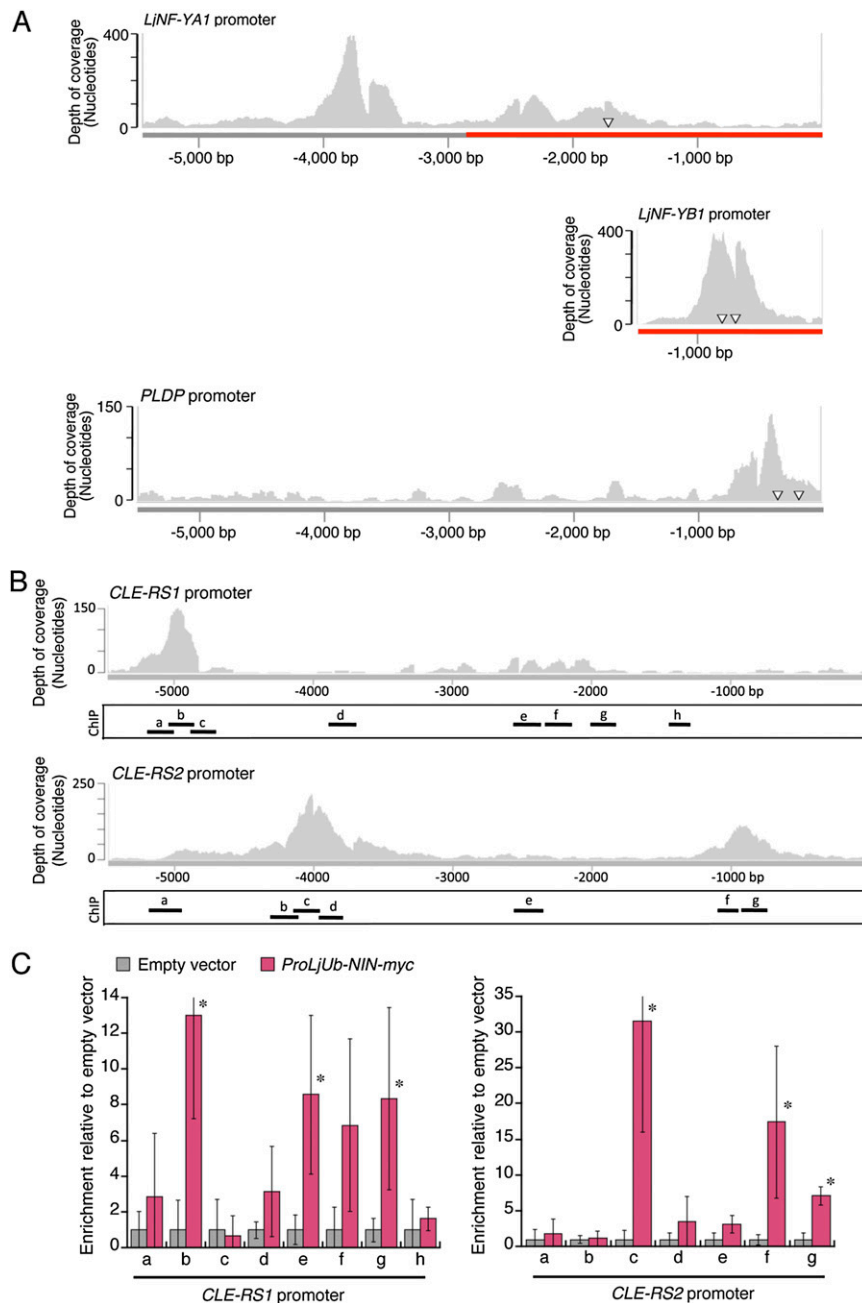

**Fig. S2.** ChIP-seq analysis of known NIN target genes and ChIP-PCR analysis to confirm binding of NIN with the *CLE-RS1* and *CLE-RS2* promoters. (A) Read coverage of *LjNF-YA1*, *LjNF-YB1*, and *Plastocyanin-like domain-containing protein (PLDP)* encoding gene promoter regions obtained by the ChIP-seq analysis. Red lines and arrowheads indicate promoter regions and positions of NIN-binding sites used for expression analysis and determined in our previous work (1), respectively. (B) Read coverage of the *CLE-RS1* and *CLE-RS2* promoter regions shown in Fig. 2. Regions analyzed by ChIP-PCR are indicated as short bars in boxes. (C) ChIP-PCR was performed to examine NIN binding with *CLE-RS1* and *CLE-RS2* promoter regions. DNA fragments were coimmunoprecipitated with polyclonal anti-myc antibodies from chromatin suspensions prepared from *ProLjUb-NIN-myc* roots or control (empty vector) roots. DNA fragments corresponding to regions indicated in B were analyzed by RT-PCR. Amounts of DNA fragments were normalized to input data. Data are mean  $\pm$  SD of three biological repeats. Asterisks indicate significant differences compared with empty vector control roots according to the Student *t* test. \**P* < 0.1.



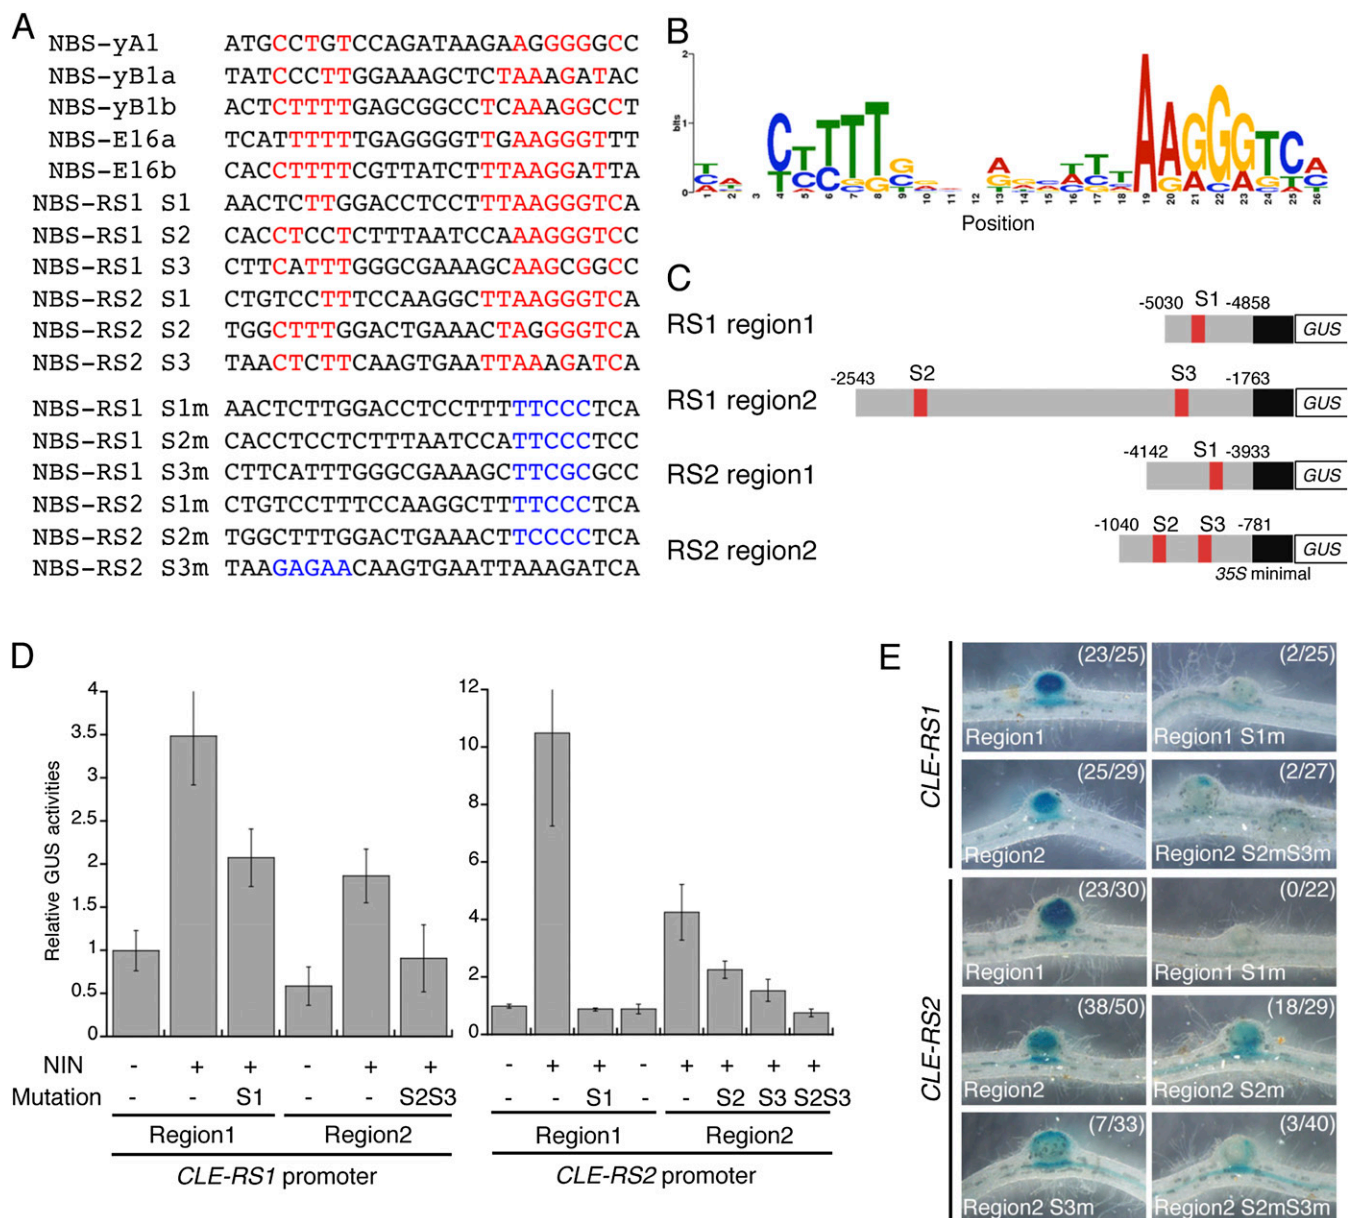

**Fig. 54.** NBS-dependent transcriptional activation by NIN. (A) Alignment of NBSs. NBS-yA1, -yB1a, -yB1b, -E16a, and -E16b have been reported previously (1). NBS-RS1 S1–S3 and NBS-RS2 S1–S3 were identified in the *CLE-RS1* and *CLE-RS2* promoters in this study. NBS-RS1 S1m–S3m and NBS-RS2 S1m–S3m are mutant derivatives. Red characters represent highly conserved nucleotides. Blue characters indicate substituted nucleotides. (B) Sequence logo for NBSs aligned in A. (C) Illustration of promoter-GUS constructs. Promoter fragments containing NBSs from *CLE-RS1* and *CLE-RS2* (gray bars) were inserted upstream of the *CaMV35S* minimal promoter (black bars), followed by the GUS reporter. NBSs are represented as red bars. (D) Transient expression assay. *A. tumefaciens* strain carrying a vector harboring each GUS reporter construct and either *Pro35S-NIN* or *Pro35S-HPH* as control and another *Agrobacterium* strain carrying *Pro35S-LUC* were coinfiltrated into *N. benthamiana* leaves. GUS activities in leaf tissues harvested at 2.5 d after infiltration were measured and normalized to those of luciferase. Data are mean  $\pm$  SD from three biological repeats. (E) GUS expression in nodule primordia. Roots transformed with each GUS reporter construct were inoculated with *Mesorhizobium loti*. GUS expression was analyzed at 7 d after inoculation (dai). All samples were incubated in GUS staining buffer for 2 h. The fractions of transformed roots exhibiting GUS expression in nodule primordia are in parentheses.



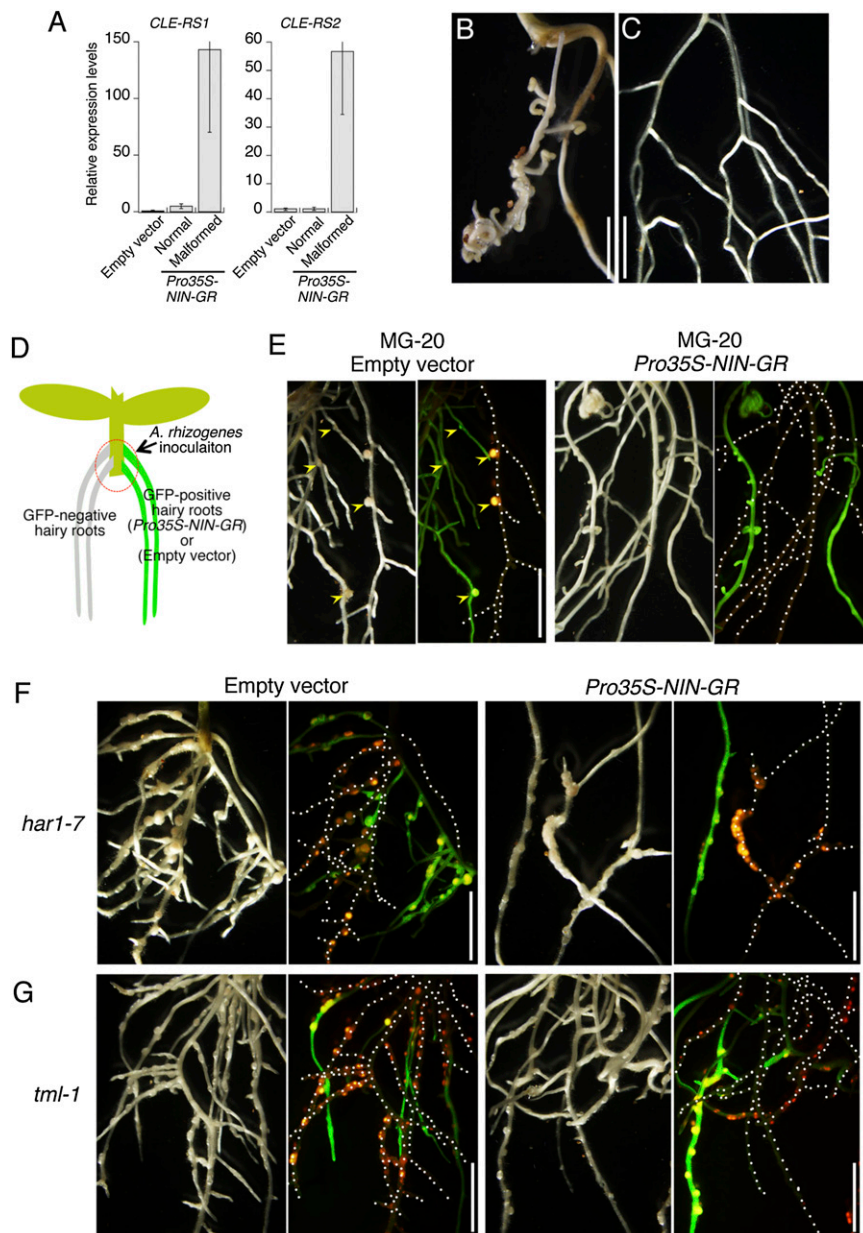

**Fig. S5.** Expression of *CLE-RS1* and *CLE-RS2* in *Pro35S-NIN-GR* roots, and systemic effects of *NIN* overexpression on nodulation. (A) Expression analysis of *CLE-RS1* and *CLE-RS2* in *Pro35S-NIN-GR* roots. Plants with roots that were transformed with the empty vector or *Pro35S-NIN-GR* were cultured for 2 wk in the presence of dexamethasone (DEX). *Pro35S-NIN-GR* roots could be categorized into two groups, malformed roots and roots with normal structure. Expression of *CLE-RS1* and *CLE-RS2* was analyzed by RT-PCR. Expression levels were normalized using *polyubiquitin* expression. Data are mean  $\pm$  SD of three biological repeats. (B and C) Roots transformed with *Pro35S-NIN-GR*. Plants were cultured for 3 wk in the presence of DEX and in the absence of rhizobia. A malformed root with the severe phenotype (B) and a root with apparently normal architecture (C) are shown. (Scale bars: 5 mm.) (D) Illustration of the *Agrobacterium*-mediated root transformation. (E–G) Nodulation on GFP-negative and GFP-positive hairy roots generated in MG-20 (E), *hypernodulation aberrant root formation 1-7* (*har1-7*) (F), and *too much love-1* (*tml-1*) (G) backgrounds. Roots were transformed with *Pro35S-NIN-GR* or the empty vector by the standard *Agrobacterium*-mediated root transformation as illustrated in D. (Left) Bright-field images. (Right) Corresponding fluorescent images with GFP as a transformation marker for roots and DsRed expressed in *M. loti*. Broken lines in the right panels represent GFP-negative roots. Arrowheads in (E) indicate infected nodules. Note the absence of nodules in the plant with malformed *Pro35S-NIN-GR* roots. (Scale bars: 5 mm.)



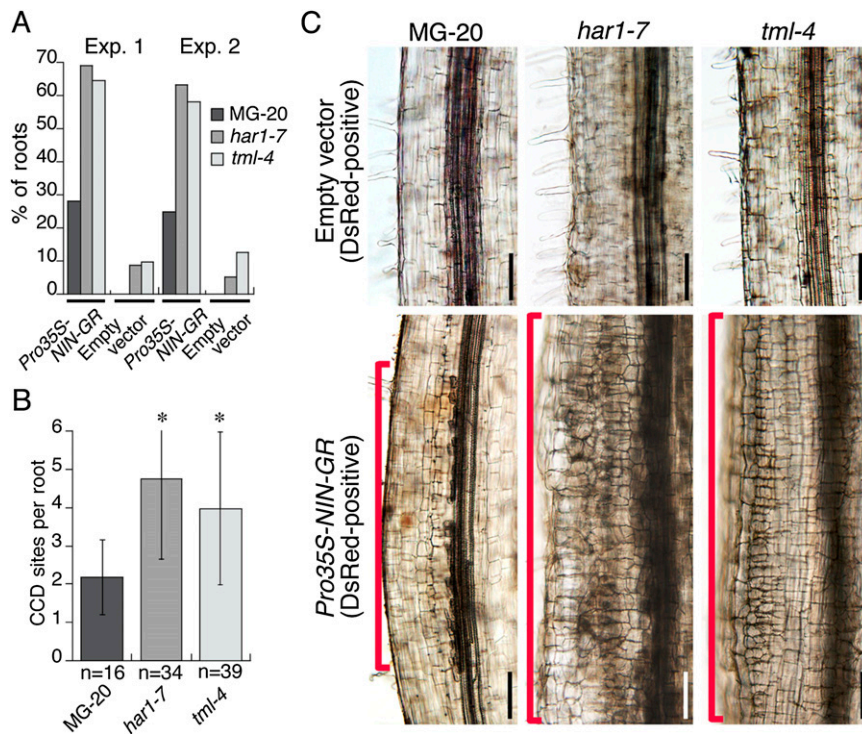

**Fig. S7.** Cortical cell divisions induced by *NIN* overexpression in *har1* and *tml* mutants. (A) Proportions of DsRed-positive *Pro35S-NIN-GR* roots with ectopic cortical cell division in two independent experiments. More than 25 roots were analyzed in each line. (B) Mean  $\pm$  SD numbers of sites where cortical cell division occurred in DsRed-positive *Pro35S-NIN-GR* roots. Asterisks indicate significant differences from MG-20 according to the Student *t* test ( $P < 0.01$ ). (C) Ectopic cortical cell division in transformed roots. Plants with roots transformed with the empty vector or *Pro35S-NIN-GR* were cultured for 3 wk after being transferred to soil supplemented with DEX. Red bars indicate regions in which cortical cell division occurred. (Scale bars: 100  $\mu$ m.)

## Other Supporting Information Files

[Table S1 \(DOCX\)](#)  
[Dataset S1 \(XLSX\)](#)
